# Supplementary material
Source: Springer Nature journal article supplement (https://www.springermedizin.de/resource/supplementary/12943_2012_1060_MOESM12_ESM.pdf/9552198)

**A**

Early Metastatic Melanoma  
(normal serum LDH)

Advanced Metastatic Melanoma  
(high serum LDH)

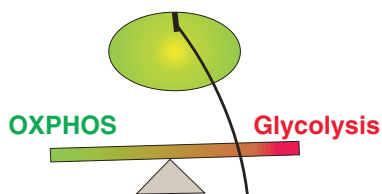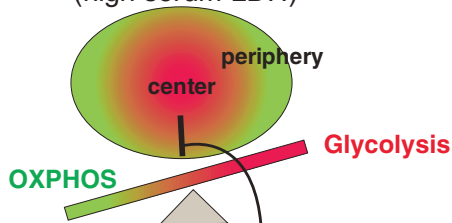**B**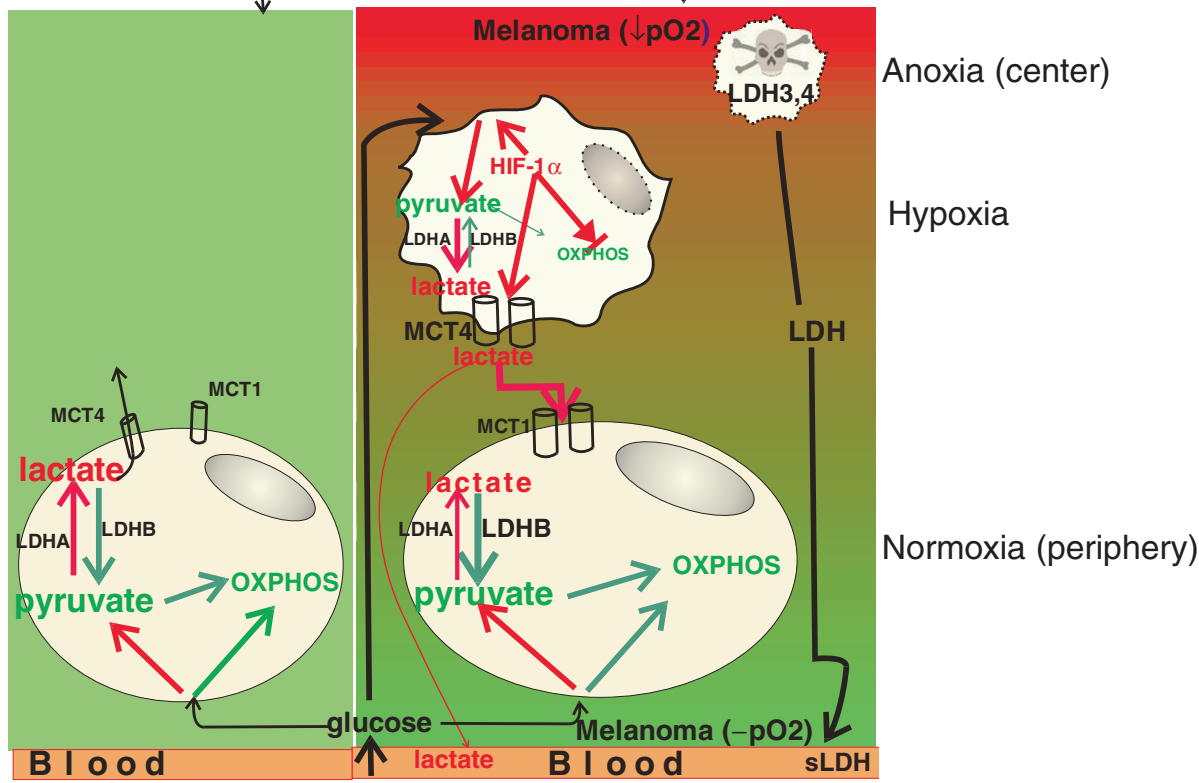

Supplement: MOESM12 [file 9552198]
